# Supplementary material for: Transdermal delivery of insulin using a solid-in-oil nanodispersion enhanced by arginine-rich peptides
Source: Royal Society of Chemistry journal article supplement (doi:10.1039/c2md20059g), 2012-01-01
Supplement: c2md20059g.pdf [file c2md20059g.pdf]

## Supplementary Information

### Transdermal delivery of insulin using a solid-in-oil nanodispersion enhanced by arginine-rich peptides

Yoshiro Tahara<sup>#a</sup>, Shota Honda<sup>#a</sup>, Noriho Kamiya<sup>a,b</sup> and Masahiro Goto<sup>\*a,b,c</sup>

<sup>a</sup>Department of Applied Chemistry, Graduate School of Engineering, and <sup>b</sup>Center for Future Chemistry, Kyushu University, 744 Moto-oka, Fukuoka 819-0395, Japan.

<sup>c</sup>SO Pharmaceutical Corporation, 1-5-2 Minatojima-minamimachi, Kobe 650-0047, Japan

<sup>#</sup>These authors contributed equally to this work.

\*Correspondence should be addressed to Masahiro Goto (E-mail: m-goto@mail.cstm.kyushu-u.ac.jp)

#### Supplementary figures

a) S/O nanodispersion without R9

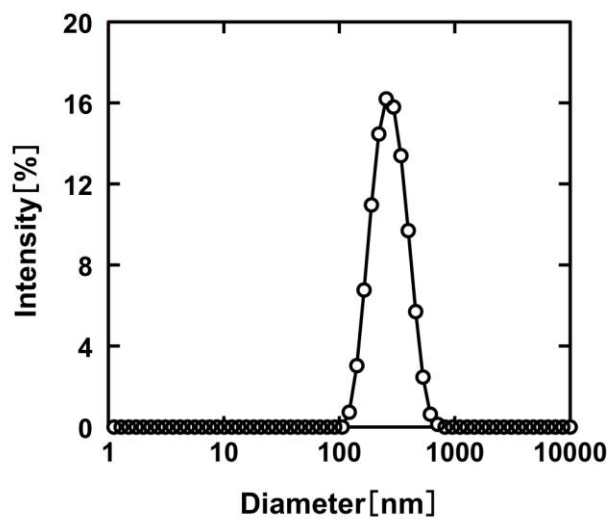

b) S/O nanodispersion with R9

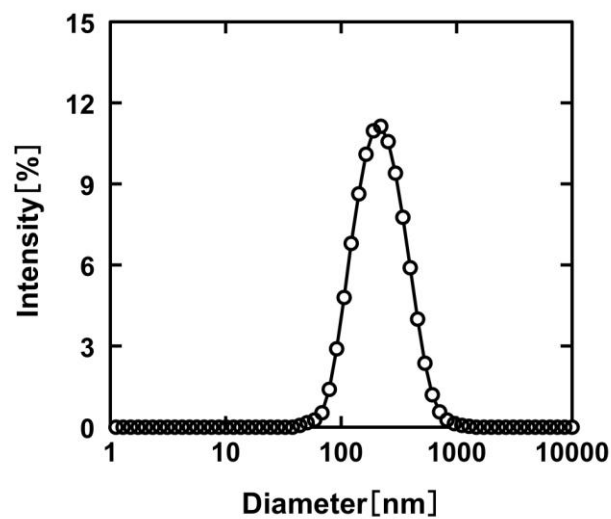

Fig. S1 Size distribution of S/O nanodispersions containing insulin (a) without and (b) with R9.
